# Supplementary material for: Ivabradine Prevents Low Shear Stress Induced Endothelial Inflammation and Oxidative Stress via mTOR/eNOS Pathway
Source: PubMed Central journal article supplement (PMC4758626; doi:10.1371/journal.pone.0149694), 2016-02-18
Supplement: pone.0149694.s001.pdf [file pone.0149694.s001.pdf]

| CT<br>group | $2^{-\Delta\Delta}$ |          |          |
|-------------|---------------------|----------|----------|
|             | IL-6                | VCAM-1   | eNOS     |
| LSS0        | 1                   | 1        | 1        |
| LSS0        | 1                   | 1        | 1        |
| LSS0        | 1                   | 1        | 1        |
| LSS30       | 3.802636            | 2.396618 | 0.118503 |
| LSS30       | 2.45207             | 2.142062 | 0.289975 |
| LSS30       | 1.943962            | 1.626758 | 0.334946 |
| LSS120      | 2.139094            | 2.105262 | 0.552099 |
| LSS120      | 2.212995            | 1.573525 | 0.489032 |
| LSS120      | 2.450371            | 2.361985 | 0.443806 |

| CT<br>group | $2^{-\Delta\Delta}$ |          |          |
|-------------|---------------------|----------|----------|
|             | IL-6                | VCAM-1   | eNOS     |
| LSS0        | 1                   | 1        | 1        |
| LSS0        | 1                   | 1        | 1        |
| LSS0        | 1                   | 1        | 1        |
| LSS30       | 1.143138            | 3.069492 | 0.819605 |
| LSS30       | 1.598812            | 2.472551 | 0.737646 |
| LSS30       | 1.302244            | 2.194664 | 0.857971 |
| Iva0        | 1.06437             | 1.095812 | 1.059953 |
| Iva0        | 0.964598            | 1.006956 | 0.950659 |
| Iva0        | 1.044636            | 0.993093 | 0.968618 |
| Iva30       | 0.629379            | 0.533663 | 0.992404 |
| Iva30       | 0.46684             | 0.382094 | 0.988286 |
| Iva30       | 0.68302             | 0.262611 | 1.032399 |

| CT<br>group | $2^{-\Delta\Delta}$ |          |          |
|-------------|---------------------|----------|----------|
|             | IL-6                | VCAM-1   | eNOS     |
| LSS0        | 1                   | 1        | 1        |
| LSS0        | 1                   | 1        | 1        |
| LSS0        | 1                   | 1        | 1        |
| LSS120      | 1.949359            | 1.982059 | 0.683494 |
| LSS120      | 1.523089            | 2.640846 | 0.596668 |
| LSS120      | 2.604488            | 1.876442 | 0.658383 |
| Iva0        | 1.140764            | 1.126619 | 0.961927 |
| Iva0        | 0.964598            | 1.414214 | 1.175276 |
| Iva0        | 1.583372            | 0.978742 | 0.983502 |
| Iva120      | 1.174462            | 1.057018 | 1.032399 |
| Iva120      | 1.000693            | 1.091264 | 1.046085 |
| Iva120      | 1.464086            | 1.036701 | 0.926588 |

| group | $2^{-\Delta\Delta CT}$ |          |          |
|-------|------------------------|----------|----------|
|       | IL-6                   | VCAM-1   | eNOS     |
| LSS0  | 1                      | 1        | 1        |
| LSS0  | 1                      | 1        | 1        |
| LSS0  | 1                      | 1        | 1        |
| LSS30 | 2.155466               | 2.703822 | 0.331711 |
| LSS30 | 3.342668               | 2.191624 | 0.270744 |
| LSS30 | 3.069492               | 3.630077 | 0.478304 |
| Iva30 | 1.043189               | 1.406393 | 0.780786 |
| Iva30 | 1.022429               | 1.201636 | 1.028114 |
| Iva30 | 1.02669                | 1.41814  | 0.806642 |
| LY30  | 1.618884               | 2.093621 | 0.183011 |
| LY30  | 1.94531                | 2.226843 | 0.192776 |
| LY30  | 1.933212               | 2.566852 | 0.313383 |
