# Supplementary material for: Ivabradine Prevents Low Shear Stress Induced Endothelial Inflammation and Oxidative Stress via mTOR/eNOS Pathway
Source: PubMed Central journal article supplement (PMC4758626; doi:10.1371/journal.pone.0149694), 2016-02-18
Supplement: pone.0149694.s002.pdf [file pone.0149694.s002.pdf]

| positive<br>rate<br>group | DHE      | DCF      | IL-6     | VCAM-1   | eNOS-Thr495 |
|---------------------------|----------|----------|----------|----------|-------------|
| LSS0                      | 0.0308   | 0.064516 | 0.02135  | 0.039007 | 0.051282    |
| LSS0                      | 0.00877  | 0.046283 | 0.03508  | 0.030303 | 0.055555    |
| LSS0                      | 0.00658  | 0.050222 | 0.01379  | 0.03492  | 0.032967    |
| LSS0                      | 0.01685  | 0.046379 | 0.03614  | 0.02848  | 0.05        |
| LSS0                      | 0.02614  | 0.048298 | 0.04     | 0.046428 | 0.04301     |
| LSS30                     | 0.51786  | 0.677137 | 0.5      | 0.47445  | 0.0583333   |
| LSS30                     | 0.38583  | 0.584192 | 0.5955   | 0.63725  | 0.5         |
| LSS30                     | 0.42537  | 0.740668 | 0.44186  | 0.692307 | 0.451219    |
| LSS30                     | 0.4964   | 0.734375 | 0.51538  | 0.608108 | 0.4090909   |
| LSS30                     | 0.58462  | 0.538476 | 0.44339  | 0.474025 | 0.547297    |
| Iva0                      | 0.153846 | 0.045593 | 0.05147  | 0.04918  | 0.030303    |
| Iva0                      | 0.16129  | 0.063091 | 0.03529  | 0.038095 | 0.02325     |
| Iva0                      | 0.175439 | 0.062092 | 0.0318   | 0.045161 | 0.0510204   |
| Iva0                      | 0.194805 | 0.057399 | 0.01069  | 0.039173 | 0.0592178   |
| Iva0                      | 0.1      | 0.043786 | 0.01148  | 0.044982 | 0.0429764   |
| Iva30                     | 0.029703 | 0.11093  | 0.055172 | 0.075555 | 0.0628019   |
| Iva30                     | 0.04     | 0.110106 | 0.071428 | 0.052631 | 0.084501    |
| Iva30                     | 0.075269 | 0.130014 | 0.079681 | 0.050691 | 0.067873    |
| Iva30                     | 0.074766 | 0.123858 | 0.065149 | 0.051849 | 0.059248    |
| Iva30                     | 0.048544 | 0.122385 | 0.05873  | 0.047103 | 0.0528194   |

| positive<br>rate<br>group | DHE      | DCF      | IL-6     | VCAM-1   | eNOS-Thr495 |
|---------------------------|----------|----------|----------|----------|-------------|
| LSS0                      | 0.0308   | 0.064516 | 0.02135  | 0.039007 | 0.051282    |
| LSS0                      | 0.00877  | 0.046283 | 0.03508  | 0.030303 | 0.055555    |
| LSS0                      | 0.00658  | 0.050222 | 0.01379  | 0.03492  | 0.032967    |
| LSS0                      | 0.01685  | 0.046379 | 0.03614  | 0.02848  | 0.05        |
| LSS0                      | 0.02614  | 0.048298 | 0.04     | 0.046428 | 0.04301     |
| LSS30                     | 0.51786  | 0.677137 | 0.5      | 0.47445  | 0.0583333   |
| LSS30                     | 0.38583  | 0.584192 | 0.5955   | 0.63725  | 0.5         |
| LSS30                     | 0.42537  | 0.740668 | 0.44186  | 0.692307 | 0.451219    |
| LSS30                     | 0.4964   | 0.734375 | 0.51538  | 0.608108 | 0.4090909   |
| LSS30                     | 0.58462  | 0.538476 | 0.44339  | 0.474025 | 0.547297    |
| Iva30                     | 0.029703 | 0.11093  | 0.055172 | 0.075555 | 0.0628019   |
| Iva30                     | 0.04     | 0.110106 | 0.071428 | 0.052631 | 0.084501    |
| Iva30                     | 0.075269 | 0.130014 | 0.079681 | 0.050691 | 0.067873    |
| Iva30                     | 0.074766 | 0.123858 | 0.065149 | 0.051849 | 0.059248    |
| Iva30                     | 0.048544 | 0.122385 | 0.05873  | 0.047103 | 0.0528194   |
| LY30                      | 0.5709   | 0.487106 | 0.53431  | 0.683168 | 0.436274    |
| LY30                      | 0.4811   | 0.478455 | 0.542857 | 0.523076 | 0.446511    |
| LY30                      | 0.6861   | 0.458333 | 0.515384 | 0.449152 | 0.464646    |
| LY30                      | 0.5188   | 0.487639 | 0.513849 | 0.539185 | 0.478538    |
| LY30                      | 0.3953   | 0.469729 | 0.518375 | 0.622874 | 0.4375892   |

| positive<br>rate<br>group | DHE      | DCF      | IL-6     | VCAM-1   | eNOS-Thr495 |
|---------------------------|----------|----------|----------|----------|-------------|
| LSS0                      | 0.0308   | 0.064516 | 0.02135  | 0.039007 | 0.051282    |
| LSS0                      | 0.00877  | 0.046283 | 0.03508  | 0.030303 | 0.055555    |
| LSS0                      | 0.00658  | 0.050222 | 0.01379  | 0.03492  | 0.032967    |
| LSS0                      | 0.01685  | 0.046379 | 0.03614  | 0.02848  | 0.05        |
| LSS0                      | 0.02614  | 0.048298 | 0.04     | 0.046428 | 0.04301     |
| LSS120                    | 0.432767 | 0.661184 | 0.571429 | 0.556818 | 0.0583333   |
| LSS120                    | 0.442219 | 0.664948 | 0.692913 | 0.608396 | 0.5         |
| LSS120                    | 0.451074 | 0.670947 | 0.647482 | 0.639456 | 0.451219    |
| LSS120                    | 0.472313 | 0.659275 | 0.566176 | 0.543269 | 0.4090909   |
| LSS120                    | 0.467446 | 0.672875 | 0.708661 | 0.55     | 0.547297    |
| Iva0                      | 0.033846 | 0.045593 | 0.04918  | 0.04918  | 0.030303    |
| Iva0                      | 0.03129  | 0.063091 | 0.038095 | 0.038095 | 0.02325     |
| Iva0                      | 0.025439 | 0.062092 | 0.045161 | 0.045161 | 0.0510204   |
| Iva0                      | 0.034805 | 0.057399 | 0.039173 | 0.039173 | 0.0592178   |
| Iva0                      | 0.02     | 0.043786 | 0.044982 | 0.044982 | 0.0429764   |
| Iva120                    | 0.112637 | 0.134615 | 0.082949 | 0.132353 | 0.0628019   |
| Iva120                    | 0.120915 | 0.126453 | 0.098712 | 0.096491 | 0.084501    |
| Iva120                    | 0.106101 | 0.130802 | 0.011111 | 0.128755 | 0.067873    |
| Iva120                    | 0.131222 | 0.128765 | 0.106838 | 0.117371 | 0.059248    |
| Iva120                    | 0.138539 | 0.137476 | 0.095477 | 0.123894 | 0.0528194   |
