# Supplementary material for: Ivabradine Prevents Low Shear Stress Induced Endothelial Inflammation and Oxidative Stress via mTOR/eNOS Pathway
Source: PubMed Central journal article supplement (PMC4758626; doi:10.1371/journal.pone.0149694), 2016-02-18
Supplement: pone.0149694.s003.pdf [file pone.0149694.s003.pdf]

| group \ eNOS-Thr495 | Mean    | SD       | N |
|---------------------|---------|----------|---|
| LSS0                | 0.44707 | 0.415133 | 3 |
| LSS5                | 1.62141 | 0.440732 | 3 |
| LSS15               | 1.92779 | 0.679016 | 3 |
| LSS30               | 2.20396 | 0.48966  | 3 |
| LSS60               | 1.77627 | 0.465466 | 3 |
| LSS120              | 1.90368 | 0.117605 | 3 |

| group \ p70S6K | Mean     | SD       | N |
|----------------|----------|----------|---|
| LSS0           | 0.367572 | 0.094126 | 3 |
| LSS5           | 0.796154 | 0.184659 | 3 |
| LSS15          | 1.004122 | 0.307339 | 3 |
| LSS30          | 0.85769  | 0.233371 | 3 |
| LSS60          | 0.423026 | 0.039829 | 3 |
| LSS120         | 0.262383 | 0.121685 | 3 |

| group \ Akt-Ser473 | Mean    | SD       | N |
|--------------------|---------|----------|---|
| LSS0               | 2.13984 | 0.380339 | 3 |
| LSS5               | 1.41354 | 0.336529 | 3 |
| LSS15              | 1.44019 | 0.354117 | 3 |
| LSS30              | 1.87183 | 0.344326 | 3 |
| LSS60              | 1.45029 | 0.236104 | 3 |
| LSS120             | 2.06781 | 0.426976 | 3 |

| group \ rictor | Mean     | SD       | N |
|----------------|----------|----------|---|
| LSS0           | 1.838192 | 0.711462 | 3 |
| LSS5           | 1.131999 | 0.492859 | 3 |
| LSS15          | 0.955771 | 0.460782 | 3 |
| LSS30          | 0.603016 | 0.312299 | 3 |
| LSS60          | 0.720377 | 0.331103 | 3 |
| LSS120         | 0.59699  | 0.28975  | 3 |

| group \ S6RP | Mean    | SD       | N |
|--------------|---------|----------|---|
| LSS0         | 1.09609 | 0.167971 | 3 |
| LSS5         | 1.3518  | 0.196438 | 3 |
| LSS15        | 1.59734 | 0.221885 | 3 |
| LSS30        | 1.41496 | 0.277374 | 3 |
| LSS60        | 1.12461 | 0.289305 | 3 |
| LSS120       | 0.65011 | 0.195668 | 3 |

| group \ raptor | Mean     | SD       | N |
|----------------|----------|----------|---|
| LSS0           | 0.134131 | 0.062236 | 3 |
| LSS5           | 0.196258 | 0.049744 | 3 |
| LSS15          | 1.436064 | 0.262562 | 3 |
| LSS30          | 1.422383 | 0.203643 | 3 |
| LSS60          | 0.650205 | 0.072318 | 3 |
| LSS120         | 0.699628 | 0.101285 | 3 |

| group \ p70S6K | Mean    | SD       | N |
|----------------|---------|----------|---|
| LSS0           | 0.68871 | 0.147735 | 3 |
| Iva0           | 0.5399  | 0.185534 | 3 |
| LSS30          | 1.64788 | 0.315498 | 3 |
| Iva30          | 0.38658 | 0.130383 | 3 |

| group \ rictor | Mean     | SD       | N |
|----------------|----------|----------|---|
| LSS0           | 1.291165 | 0.274109 | 3 |
| Iva0           | 1.051972 | 0.17112  | 3 |
| LSS30          | 0.182833 | 0.08975  | 3 |
| Iva30          | 1.346067 | 0.2091   | 3 |

| group \ S6RP | Mean    | SD       | N |
|--------------|---------|----------|---|
| LSS0         | 0.24292 | 0.063246 | 3 |
| Iva0         | 0.58346 | 0.133288 | 3 |
| LSS30        | 1.28016 | 0.271819 | 3 |
| Iva30        | 0.58102 | 0.110616 | 3 |

| group \ eNOS-Thr495 | Mean     | SD       | N |
|---------------------|----------|----------|---|
| LSS0                | 0.486134 | 0.078159 | 3 |
| Iva0                | 0.545473 | 0.097137 | 3 |
| LSS30               | 1.397495 | 0.13834  | 3 |
| Iva30               | 1.142658 | 0.175568 | 3 |

| group \ raptor | Mean    | SD       | N |
|----------------|---------|----------|---|
| LSS0           | 0.1815  | 0.10304  | 3 |
| Iva0           | 0.59679 | 0.090838 | 3 |
| LSS30          | 1.51033 | 0.194213 | 3 |
| Iva30          | 0.69725 | 0.045503 | 3 |

| group \ Akt-Ser473 | Mean     | SD       | N |
|--------------------|----------|----------|---|
| LSS0               | 1.445111 | 0.211138 | 3 |
| Iva0               | 1.345494 | 0.123222 | 3 |
| LSS30              | 1.005887 | 0.027636 | 3 |
| Iva30              | 1.199221 | 0.074375 | 3 |

| group \ rictor | Mean    | SD       | N |
|----------------|---------|----------|---|
| LSS0           | 0.55384 | 0.051004 | 3 |
| Iva0           | 0.53699 | 0.066589 | 3 |
| LSS120         | 0.10416 | 0.010572 | 3 |
| Iva120         | 0.25655 | 0.019136 | 3 |

| group \ eNOS-Thr495 | Mean     | SD       | N |
|---------------------|----------|----------|---|
| LSS0                | 0.153825 | 0.068492 | 3 |
| Iva0                | 0.136464 | 0.067635 | 3 |
| LSS120              | 0.72984  | 0.107356 | 3 |
| Iva120              | 0.526113 | 0.094693 | 3 |

| group \ Akt-Ser473 | Mean    | SD       | N |
|--------------------|---------|----------|---|
| LSS0               | 1.45153 | 0.179819 | 3 |
| Iva0               | 1.37878 | 0.166557 | 3 |
| LSS120             | 0.27412 | 0.077662 | 3 |
| Iva120             | 1.20965 | 0.093877 | 3 |

| group \ Akt-Ser473 | Mean    | SD       | N |
|--------------------|---------|----------|---|
| LSS0               | 1.80518 | 0.079358 | 3 |
| LSS30              | 0.47745 | 0.201589 | 3 |
| Iva30              | 1.78655 | 0.091666 | 3 |
| LY30               | 0.579   | 0.170123 | 3 |

| group \ p70S6K | Mean     | SD       | N |
|----------------|----------|----------|---|
| LSS0           | 0.441123 | 0.091589 | 3 |
| LSS30          | 1.016074 | 0.091016 | 3 |
| Iva30          | 0.510819 | 0.074092 | 3 |
| LY30           | 1.212586 | 0.11849  | 3 |

| group \ eNOS-Thr495 | Mean    | SD       | N |
|---------------------|---------|----------|---|
| LSS0                | 1.13381 | 0.069628 | 3 |
| LSS30               | 2.32769 | 0.417334 | 3 |
| Iva30               | 1.25346 | 0.283106 | 3 |
| LY30                | 2.0078  | 0.463014 | 3 |

| group \ rictor | Mean     | SD       | N |
|----------------|----------|----------|---|
| LSS0           | 0.554327 | 0.078955 | 3 |
| LSS30          | 0.197009 | 0.050213 | 3 |
| Iva30          | 0.807351 | 0.062418 | 3 |
| LY30           | 0.277335 | 0.056082 | 3 |

| group \ S6RP | Mean    | SD       | N |
|--------------|---------|----------|---|
| LSS0         | 0.31836 | 0.044745 | 3 |
| LSS30        | 0.91998 | 0.053435 | 3 |
| Iva30        | 0.5449  | 0.046483 | 3 |
| LY30         | 0.62331 | 0.041556 | 3 |

| group \ raptor | Mean     | SD       | N |
|----------------|----------|----------|---|
| LSS0           | 0.037474 | 0.003589 | 3 |
| LSS30          | 0.672651 | 0.056251 | 3 |
| Iva30          | 0.141555 | 0.004514 | 3 |
| LY30           | 1.247958 | 0.016444 | 3 |
